# Supplementary material for: Cell-specific effects of the sole C. elegans Daughterless/E protein homolog, HLH-2, on nervous system development
Source: PubMed Central journal article supplement (PMC10108603; doi:10.1242/dev.201366), 2023-01-03
Supplement: develop-150-201366-s1.pdf [file develop-150-201366-s1.pdf]

**Table S1. Tabular comparison of all proneural bHLH expression profile**

A summary of the complete developmental expression patterns of the sole proneural Atonal ortholog *lin-32*, the sole NeuroD ortholog *cnd-1*, the sole neurogenin ortholog *ngn-1*, and three of the five AS-C homologs (*hlh-3*, *hlh-4*, *hlh-14*) has been generated using fosmid-based reporter transgenes and/or CRISPR/Cas9-engineered reporter alleles (Masoudi et al. 2018; Masoudi et al. 2021). Colored box indicates that the respective gene is expressed at any point in the lineage that generates the indicated neuron type.

| Class | Subclass | <i>hlh-2</i> | <i>hlh-3</i> | <i>hlh-14</i> | <i>cnd-1</i> | <i>ngn-1</i> | <i>lin-32</i> |
|-------|----------|--------------|--------------|---------------|--------------|--------------|---------------|
| ADA   | L        |              |              |               |              |              |               |
|       | R        |              |              |               |              |              |               |
| ADE   | L        |              |              |               |              |              |               |
|       | R        |              |              |               |              |              |               |
| ADF   | L        |              |              |               |              |              |               |
|       | R        |              |              |               |              |              |               |
| ADL   | L        |              |              |               |              |              |               |
|       | R        |              |              |               |              |              |               |
| AFD   | L        |              |              |               |              |              |               |
|       | R        |              |              |               |              |              |               |
| AIA   | L        |              |              |               |              |              |               |
|       | R        |              |              |               |              |              |               |
| AIB   | L        |              |              |               |              |              |               |
|       | R        |              |              |               |              |              |               |
| AIM   | L        |              |              |               |              |              |               |
|       | R        |              |              |               |              |              |               |
| AIN   | L        |              |              |               |              |              |               |
|       | R        |              |              |               |              |              |               |
| AIX   | L        |              |              |               |              |              |               |
|       | R        |              |              |               |              |              |               |
| AIZ   | L        |              |              |               |              |              |               |
|       | R        |              |              |               |              |              |               |
| ALA   | L        |              |              |               |              |              |               |
| ALM   | L        |              |              |               |              |              |               |
|       | R        |              |              |               |              |              |               |
| ALN   | L        |              |              |               |              |              |               |
|       | R        |              |              |               |              |              |               |
| ASE   | L        |              |              |               |              |              |               |
|       | R        |              |              |               |              |              |               |
| ASG   | L        |              |              |               |              |              |               |
|       | R        |              |              |               |              |              |               |
| ASH   | L        |              |              |               |              |              |               |
|       | R        |              |              |               |              |              |               |
| ASI   | L        |              |              |               |              |              |               |
|       | R        |              |              |               |              |              |               |
| ASJ   | L        |              |              |               |              |              |               |
|       | R        |              |              |               |              |              |               |
| ASK   | L        |              |              |               |              |              |               |
|       | R        |              |              |               |              |              |               |
| AUA   | L        |              |              |               |              |              |               |
|       | R        |              |              |               |              |              |               |
| AVA   | L        |              |              |               |              |              |               |
|       | R        |              |              |               |              |              |               |
| AVB   | L        |              |              |               |              |              |               |
|       | R        |              |              |               |              |              |               |
| AVD   | L        |              |              |               |              |              |               |
|       | R        |              |              |               |              |              |               |
| AVE   | L        |              |              |               |              |              |               |
|       | R        |              |              |               |              |              |               |
| AVG   | L        |              |              |               |              |              |               |
|       | R        |              |              |               |              |              |               |
| AVH   | L        |              |              |               |              |              |               |
|       | R        |              |              |               |              |              |               |
| AVJ   | L        |              |              |               |              |              |               |
|       | R        |              |              |               |              |              |               |
| AVK   | L        |              |              |               |              |              |               |
|       | R        |              |              |               |              |              |               |
| AVL   | L        |              |              |               |              |              |               |
| AWA   | L        |              |              |               |              |              |               |
|       | R        |              |              |               |              |              |               |
| AWB   | L        |              |              |               |              |              |               |
|       | R        |              |              |               |              |              |               |
| AWC   | L        |              |              |               |              |              |               |
|       | R        |              |              |               |              |              |               |
| BAG   | L        |              |              |               |              |              |               |
|       | R        |              |              |               |              |              |               |
| BDU   | L        |              |              |               |              |              |               |
|       | R        |              |              |               |              |              |               |
| CAN   | L        |              |              |               |              |              |               |
|       | R        |              |              |               |              |              |               |
| CEP   | DL       |              |              |               |              |              |               |
|       | DR       |              |              |               |              |              |               |
|       | VL       |              |              |               |              |              |               |
|       | VR       |              |              |               |              |              |               |
| DA    | 1        |              |              |               |              |              |               |
|       | 2        |              |              |               |              |              |               |
|       | 3        |              |              |               |              |              |               |
|       | 4        |              |              |               |              |              |               |
|       | 5        |              |              |               |              |              |               |
|       | 6        |              |              |               |              |              |               |
|       | 7        |              |              |               |              |              |               |
|       | 8        |              |              |               |              |              |               |
|       | 9        |              |              |               |              |              |               |
| DB    | 1        |              |              |               |              |              |               |
|       | 2        |              |              |               |              |              |               |
|       | 3        |              |              |               |              |              |               |
|       | 4        |              |              |               |              |              |               |
|       | 5        |              |              |               |              |              |               |
|       | 6        |              |              |               |              |              |               |
|       | 7        |              |              |               |              |              |               |
| DD    | 1        |              |              |               |              |              |               |
|       | 2        |              |              |               |              |              |               |
|       | 3        |              |              |               |              |              |               |
|       | 4        |              |              |               |              |              |               |
|       | 5        |              |              |               |              |              |               |
|       | 6        |              |              |               |              |              |               |
| DVA   | L        |              |              |               |              |              |               |
| DVC   | L        |              |              |               |              |              |               |
| FLP   | L        |              |              |               |              |              |               |
|       | R        |              |              |               |              |              |               |
| HSN   | L        |              |              |               |              |              |               |
|       | R        |              |              |               |              |              |               |
| I1    | L        |              |              |               |              |              |               |
|       | R        |              |              |               |              |              |               |
| I2    | L        |              |              |               |              |              |               |
|       | R        |              |              |               |              |              |               |
| I3    | L        |              |              |               |              |              |               |
|       | R        |              |              |               |              |              |               |
| I4    | L        |              |              |               |              |              |               |
|       | R        |              |              |               |              |              |               |
| I5    | L        |              |              |               |              |              |               |
|       | R        |              |              |               |              |              |               |
| I6    | L        |              |              |               |              |              |               |
|       | R        |              |              |               |              |              |               |
| IL1   | DL       |              |              |               |              |              |               |
|       | DR       |              |              |               |              |              |               |
|       | L        |              |              |               |              |              |               |
|       | R        |              |              |               |              |              |               |
|       | VL       |              |              |               |              |              |               |
|       | VR       |              |              |               |              |              |               |
| IL2   | DL       |              |              |               |              |              |               |
|       | DR       |              |              |               |              |              |               |
|       | L        |              |              |               |              |              |               |
|       | R        |              |              |               |              |              |               |
|       | VL       |              |              |               |              |              |               |
|       | VR       |              |              |               |              |              |               |
| LUA   | L        |              |              |               |              |              |               |
|       | R        |              |              |               |              |              |               |
| M1    | L        |              |              |               |              |              |               |
| M2    | L        |              |              |               |              |              |               |
|       | R        |              |              |               |              |              |               |
| M3    | L        |              |              |               |              |              |               |
|       | R        |              |              |               |              |              |               |
| M4    | L        |              |              |               |              |              |               |
| M5    | L        |              |              |               |              |              |               |
| MC    | L        |              |              |               |              |              |               |
|       | R        |              |              |               |              |              |               |
| MI    | L        |              |              |               |              |              |               |
| NSM   | L        |              |              |               |              |              |               |
|       | R        |              |              |               |              |              |               |
| OLL   | L        |              |              |               |              |              |               |
|       | R        |              |              |               |              |              |               |
| OLQ   | DL       |              |              |               |              |              |               |
|       | DR       |              |              |               |              |              |               |
|       | VL       |              |              |               |              |              |               |
|       | VR       |              |              |               |              |              |               |
| PHA   | L        |              |              |               |              |              |               |
|       | R        |              |              |               |              |              |               |
| PHB   | L        |              |              |               |              |              |               |
|       | R        |              |              |               |              |              |               |
| PLM   | L        |              |              |               |              |              |               |
|       | R        |              |              |               |              |              |               |
| PVC   | L        |              |              |               |              |              |               |
|       | R        |              |              |               |              |              |               |
| PVP   | L        |              |              |               |              |              |               |
|       | R        |              |              |               |              |              |               |
| PVQ   | L        |              |              |               |              |              |               |
|       | R        |              |              |               |              |              |               |
| PVT   | L        |              |              |               |              |              |               |
| RIA   | L        |              |              |               |              |              |               |
|       | R        |              |              |               |              |              |               |
| RIB   | L        |              |              |               |              |              |               |
|       | R        |              |              |               |              |              |               |
| RIC   | L        |              |              |               |              |              |               |
|       | R        |              |              |               |              |              |               |
| RID   | L        |              |              |               |              |              |               |
| RIF   | L        |              |              |               |              |              |               |
|       | R        |              |              |               |              |              |               |
| RIG   | L        |              |              |               |              |              |               |
|       | R        |              |              |               |              |              |               |
| RIH   | L        |              |              |               |              |              |               |
| RIM   | L        |              |              |               |              |              |               |
|       | R        |              |              |               |              |              |               |
| RIP   | L        |              |              |               |              |              |               |
|       | R        |              |              |               |              |              |               |
| RIR   | L        |              |              |               |              |              |               |
| RIS   | L        |              |              |               |              |              |               |
| RIV   | L        |              |              |               |              |              |               |
|       | R        |              |              |               |              |              |               |
| RMD   | DL       |              |              |               |              |              |               |
|       | DR       |              |              |               |              |              |               |
|       | L        |              |              |               |              |              |               |
|       | R        |              |              |               |              |              |               |
|       | VL       |              |              |               |              |              |               |
|       | VR       |              |              |               |              |              |               |
| RME   | DL       |              |              |               |              |              |               |
|       | DR       |              |              |               |              |              |               |
|       | VL       |              |              |               |              |              |               |
|       | VR       |              |              |               |              |              |               |
| RMG   | L        |              |              |               |              |              |               |
|       | R        |              |              |               |              |              |               |
| SAA   | DL       |              |              |               |              |              |               |
|       | DR       |              |              |               |              |              |               |
|       | VL       |              |              |               |              |              |               |
|       | VR       |              |              |               |              |              |               |
| SAB   | D        |              |              |               |              |              |               |
|       | VL       |              |              |               |              |              |               |
|       | VR       |              |              |               |              |              |               |
| SIA   | DL       |              |              |               |              |              |               |
|       | DR       |              |              |               |              |              |               |
|       | VL       |              |              |               |              |              |               |
|       | VR       |              |              |               |              |              |               |
| SIB   | DL       |              |              |               |              |              |               |
|       | DR       |              |              |               |              |              |               |
|       | VL       |              |              |               |              |              |               |
|       | VR       |              |              |               |              |              |               |
| SMB   | DL       |              |              |               |              |              |               |
|       | DR       |              |              |               |              |              |               |
|       | VL       |              |              |               |              |              |               |
|       | VR       |              |              |               |              |              |               |
| SMD   | DL       |              |              |               |              |              |               |
|       | DR       |              |              |               |              |              |               |
|       | VL       |              |              |               |              |              |               |
|       | VR       |              |              |               |              |              |               |
| URA   | DL       |              |              |               |              |              |               |
|       | DR       |              |              |               |              |              |               |
|       | VL       |              |              |               |              |              |               |
|       | VR       |              |              |               |              |              |               |
| URB   | L        |              |              |               |              |              |               |
|       | R        |              |              |               |              |              |               |
| URX   | L        |              |              |               |              |              |               |
|       | R        |              |              |               |              |              |               |
| URY   | DL       |              |              |               |              |              |               |
|       | DR       |              |              |               |              |              |               |
|       | VL       |              |              |               |              |              |               |
|       | VR       |              |              |               |              |              |               |

**Table S2. Tabular summary of neuron cell fate loss in *hh-2<sup>m/z</sup>* mutant animals.** All embryonically generated neurons, their examined neurotransmitter identities and resident terminal selectors are shown (their expression is analyzed in **Fig.3**). Color coding indicates transformation to cell death and to hypodermal fate. Also see **Table S3** for a summary of cell fate transformation, organized by neuronal cell type.

| Class  | Neuron | Transform in <i>hh-2(-)</i> | NT identity | Terminal selector |
|--------|--------|-----------------------------|-------------|-------------------|
| ADA    | ADAL   |                             |             |                   |
| ADAR   | ADAR   |                             |             |                   |
| ADE    | ADEL   |                             |             |                   |
| ADER   | ADER   |                             |             |                   |
| ADF    | ADFL   |                             |             |                   |
| ADFR   | ADFR   |                             |             |                   |
| ADL    | ADLL   |                             |             |                   |
| ADLR   | ADLR   |                             |             |                   |
| AFD    | AFDL   |                             |             |                   |
| AFDR   | AFDR   |                             |             |                   |
| AIA    | AIAL   |                             |             |                   |
| AIAR   | AIAR   |                             |             |                   |
| AIBL   | AIBL   |                             |             |                   |
| AIBR   | AIBR   |                             |             |                   |
| AIM    | AIML   |                             |             |                   |
| AIMR   | AIMR   |                             |             |                   |
| AIN    | AINL   |                             |             |                   |
| AINR   | AINR   |                             |             |                   |
| AIY    | AIYL   |                             |             |                   |
| AIYR   | AIYR   |                             |             |                   |
| AIZ    | AIZL   |                             |             |                   |
| AIZR   | AIZR   |                             |             |                   |
| ALA    | ALA    |                             |             |                   |
| ALM    | ALML   |                             |             |                   |
| ALMR   | ALMR   |                             |             |                   |
| ALN    | ALNL   |                             |             |                   |
| ALNR   | ALNR   |                             |             |                   |
| ASE    | ASEL   |                             |             |                   |
| ASER   | ASER   |                             |             |                   |
| ASG    | ASGL   |                             |             |                   |
| ASGR   | ASGR   |                             |             |                   |
| ASH    | ASHL   |                             |             |                   |
| ASHR   | ASHR   |                             |             |                   |
| ASI    | ASIL   |                             |             |                   |
| ASIR   | ASIR   |                             |             |                   |
| ASJ    | ASJL   |                             |             |                   |
| ASJR   | ASJR   |                             |             |                   |
| ASK    | ASKL   |                             |             |                   |
| ASKR   | ASKR   |                             |             |                   |
| AUA    | AUAL   |                             |             |                   |
| AUAR   | AUAR   |                             |             |                   |
| AVA    | AVAL   |                             |             |                   |
| AVAR   | AVAR   |                             |             |                   |
| AVB    | AVBL   |                             |             |                   |
| AVBR   | AVBR   |                             |             |                   |
| AVD    | AVDL   |                             |             |                   |
| AVDR   | AVDR   |                             |             |                   |
| AVE    | AVEL   |                             |             |                   |
| AVER   | AVER   |                             |             |                   |
| AVG    | AVGL   |                             |             |                   |
| AVH    | AVHL   |                             |             |                   |
| AVHR   | AVHR   |                             |             |                   |
| AVJ    | AVJL   |                             |             |                   |
| AVJR   | AVJR   |                             |             |                   |
| AVK    | AVKL   |                             |             |                   |
| AVKR   | AVKR   |                             |             |                   |
| AVL    | AVL    |                             |             |                   |
| AWA    | AWAL   |                             |             |                   |
| AWAR   | AWAR   |                             |             |                   |
| AWB    | AWBL   |                             |             |                   |
| AWBR   | AWBR   |                             |             |                   |
| AWC    | AWCL   |                             |             |                   |
| AWCR   | AWCR   |                             |             |                   |
| BAG    | BAGL   |                             |             |                   |
| BAGR   | BAGR   |                             |             |                   |
| BDU    | BDUL   |                             |             |                   |
| BDUR   | BDUR   |                             |             |                   |
| CAN    | CANL   |                             |             |                   |
| CANR   | CANR   |                             |             |                   |
| CEP    | CEPDL  |                             |             |                   |
| CEPDR  | CEPDR  |                             |             |                   |
| CEPVL  | CEPVL  |                             |             |                   |
| CEPVR  | CEPVR  |                             |             |                   |
| DA     | DA1    |                             |             |                   |
| DA2    | DA2    |                             |             |                   |
| DA3    | DA3    |                             |             |                   |
| DA4    | DA4    |                             |             |                   |
| DA5    | DA5    |                             |             |                   |
| DA6    | DA6    |                             |             |                   |
| DA7    | DA7    |                             |             |                   |
| DA8    | DA8    |                             |             |                   |
| DA9    | DA9    |                             |             |                   |
| DB     | DB1/3  |                             |             |                   |
| DB2    | DB2    |                             |             |                   |
| DB3/1  | DB3/1  |                             |             |                   |
| DB4    | DB4    |                             |             |                   |
| DB5    | DB5    |                             |             |                   |
| DB6    | DB6    |                             |             |                   |
| DB7    | DB7    |                             |             |                   |
| DD     | DD1    |                             |             |                   |
| DD2    | DD2    |                             |             |                   |
| DD3    | DD3    |                             |             |                   |
| DD4    | DD4    |                             |             |                   |
| DD5    | DD5    |                             |             |                   |
| DD6    | DD6    |                             |             |                   |
| DVA    | DVA    |                             |             |                   |
| DVC    | DVC    |                             |             |                   |
| FLP    | FLPL   |                             |             |                   |
| FLPR   | FLPR   |                             |             |                   |
| HSN    | HSNL   |                             |             |                   |
| HSNR   | HSNR   |                             |             |                   |
| IL1    | IL1R   |                             |             |                   |
| IL2    | IL2L   |                             |             |                   |
| IL2R   | IL2R   |                             |             |                   |
| IL3    | IL3    |                             |             |                   |
| IL4    | IL4    |                             |             |                   |
| IL5    | IL5    |                             |             |                   |
| IL6    | IL6    |                             |             |                   |
| IL1    | IL1DL  |                             |             |                   |
| IL1DR  | IL1DR  |                             |             |                   |
| IL1L   | IL1L   |                             |             |                   |
| IL1R   | IL1R   |                             |             |                   |
| IL1VL  | IL1VL  |                             |             |                   |
| IL1VR  | IL1VR  |                             |             |                   |
| IL2    | IL2DL  |                             |             |                   |
| IL2DR  | IL2DR  |                             |             |                   |
| IL2L   | IL2L   |                             |             |                   |
| IL2R   | IL2R   |                             |             |                   |
| IL2VL  | IL2VL  |                             |             |                   |
| IL2VR  | IL2VR  |                             |             |                   |
| LUA    | LUAL   |                             |             |                   |
| LUAR   | LUAR   |                             |             |                   |
| M1     | M1     |                             |             |                   |
| M2     | M2L    |                             |             |                   |
| M2R    | M2R    |                             |             |                   |
| M3     | M3L    |                             |             |                   |
| M3R    | M3R    |                             |             |                   |
| M4     | M4     |                             |             |                   |
| M5     | M5     |                             |             |                   |
| MC     | MCL    |                             |             |                   |
| MCR    | MCR    |                             |             |                   |
| MI     | MI     |                             |             |                   |
| NSM    | NSML   |                             |             |                   |
| NSMR   | NSMR   |                             |             |                   |
| OLL    | OLL    |                             |             |                   |
| OLLR   | OLLR   |                             |             |                   |
| OLQ    | OLQL   |                             |             |                   |
| OLQDR  | OLQDR  |                             |             |                   |
| OLQVL  | OLQVL  |                             |             |                   |
| OLQVR  | OLQVR  |                             |             |                   |
| PHA    | PHAL   |                             |             |                   |
| PHAR   | PHAR   |                             |             |                   |
| PHB    | PHBL   |                             |             |                   |
| PHBR   | PHBR   |                             |             |                   |
| PLM    | PLML   |                             |             |                   |
| PLMR   | PLMR   |                             |             |                   |
| PVC    | PVCL   |                             |             |                   |
| PVCR   | PVCR   |                             |             |                   |
| PVP    | PVPL   |                             |             |                   |
| PVPR   | PVPR   |                             |             |                   |
| PVQ    | PVQL   |                             |             |                   |
| PVQR   | PVQR   |                             |             |                   |
| PVR    | PVR    |                             |             |                   |
| PVT    | PVT    |                             |             |                   |
| RIA    | RIAL   |                             |             |                   |
| RIAR   | RIAR   |                             |             |                   |
| RIB    | RIBL   |                             |             |                   |
| RIBR   | RIBR   |                             |             |                   |
| RIC    | RICL   |                             |             |                   |
| RICR   | RICR   |                             |             |                   |
| RID    | RID    |                             |             |                   |
| RIF    | RIFL   |                             |             |                   |
| RIFR   | RIFR   |                             |             |                   |
| RIG    | RIGL   |                             |             |                   |
| RIGR   | RIGR   |                             |             |                   |
| RIH    | RIH    |                             |             |                   |
| RIM    | RIML   |                             |             |                   |
| RIMR   | RIMR   |                             |             |                   |
| RIP    | RIPL   |                             |             |                   |
| RIPR   | RIPR   |                             |             |                   |
| RIR    | RIR    |                             |             |                   |
| RIS    | RIS    |                             |             |                   |
| RIV    | RIVL   |                             |             |                   |
| RIVR   | RIVR   |                             |             |                   |
| RMD    | RMDL   |                             |             |                   |
| RMDR   | RMDR   |                             |             |                   |
| RMDL   | RMDL   |                             |             |                   |
| RMDR   | RMDR   |                             |             |                   |
| RMDVL  | RMDVL  |                             |             |                   |
| RMDVR  | RMDVR  |                             |             |                   |
| RME    | RMED   |                             |             |                   |
| RME    | RMED   |                             |             |                   |
| RME    | RME    |                             |             |                   |
| RME    | RME    |                             |             |                   |
| RME    | RME    |                             |             |                   |
| RME    | RME    |                             |             |                   |
| RMG    | RMGL   |                             |             |                   |
| RMGR   | RMGR   |                             |             |                   |
| SAA    | SAADL  |                             |             |                   |
| SAADR  | SAADR  |                             |             |                   |
| SAAVL  | SAAVL  |                             |             |                   |
| SAAVR  | SAAVR  |                             |             |                   |
| SAB    | SABL   |                             |             |                   |
| SABV   | SABV   |                             |             |                   |
| SABVR  | SABVR  |                             |             |                   |
| SIA    | SIADL  |                             |             |                   |
| SIADR  | SIADR  |                             |             |                   |
| SI AVL | SI AVL |                             |             |                   |
| SI AVR | SI AVR |                             |             |                   |
| SIB    | SIBDL  |                             |             |                   |
| SIBDR  | SIBDR  |                             |             |                   |
| SIBVL  | SIBVL  |                             |             |                   |
| SIBVR  | SIBVR  |                             |             |                   |
| SMB    | SMBDL  |                             |             |                   |
| SMBDR  | SMBDR  |                             |             |                   |
| SMBVL  | SMBVL  |                             |             |                   |
| SMBVR  | SMBVR  |                             |             |                   |
| SMD    | SMDL   |                             |             |                   |
| SMDR   | SMDR   |                             |             |                   |
| SMDVL  | SMDVL  |                             |             |                   |
| SMDVR  | SMDVR  |                             |             |                   |
| URA    | URADL  |                             |             |                   |
| URADR  | URADR  |                             |             |                   |
| URAVL  | URAVL  |                             |             |                   |
| URAVR  | URAVR  |                             |             |                   |
| URB    | URL    |                             |             |                   |
| URBL   | URBL   |                             |             |                   |
| URB    | URB    |                             |             |                   |
| URX    | URXL   |                             |             |                   |
| URXR   | URXR   |                             |             |                   |
| URY    | URYDL  |                             |             |                   |
| URYDR  | URYDR  |                             |             |                   |
| URYVL  | URYVL  |                             |             |                   |
| URYVR  | URYVR  |                             |             |                   |

Neuron fate transformed to Hyp  
 transformed to CD  
 too late / ambiguous  
 Glutamatergic (EAT-4(+))  
 Cholinergic (CHO-1(+))  
 UNC-42(+)  
 TTX-3(+)  
 UNC-86(+)  
 UNC-3(+)  
  
 122 neuron born  
 69 to Hypo  
 9 to CD  
 21 undetected
